# Supplementary material for: An enduring rapidly moving storm as a guide to Saturn's Equatorial jet's complex structure
Source: PubMed Central journal article supplement (PMC5105178; doi:10.1038/ncomms13262), 2016-11-08
Supplement: ncomms13262-s1.pdf [file ncomms13262-s1.pdf]

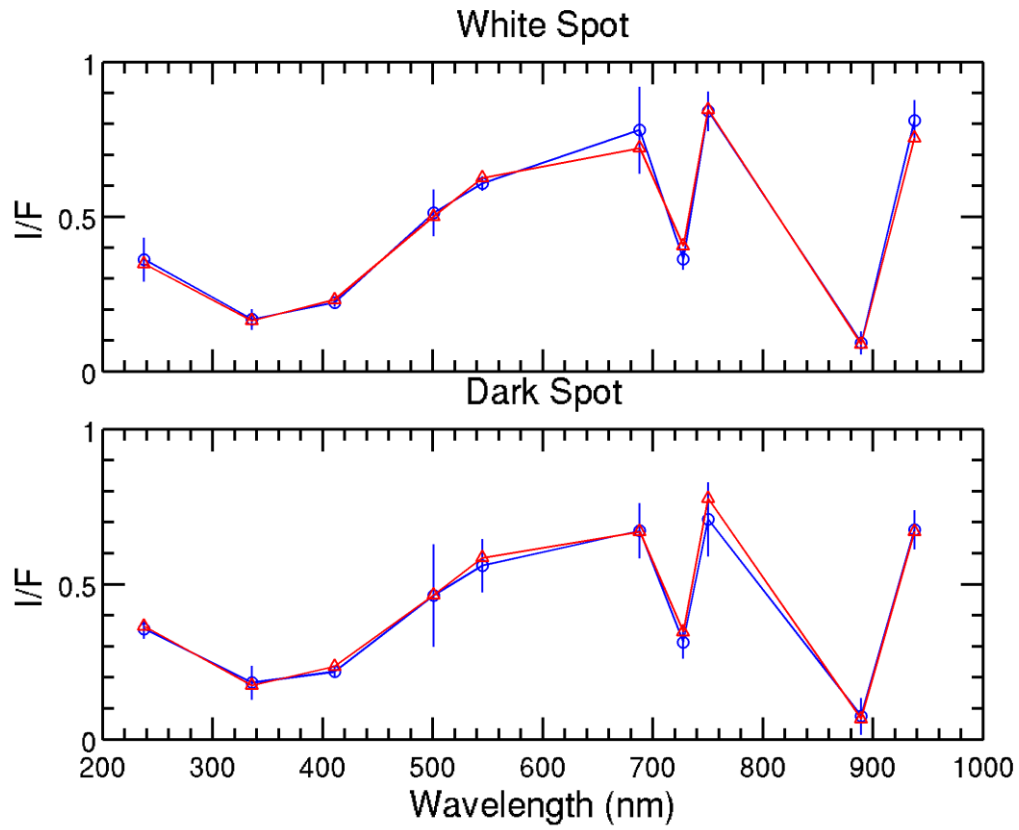

**Supplementary Figure 1.** Best fitting models (red triangles) for the White and Dark Spots compared with actual observations (blue circles). Error bars result from one standard deviation of the data collected at each filter images.

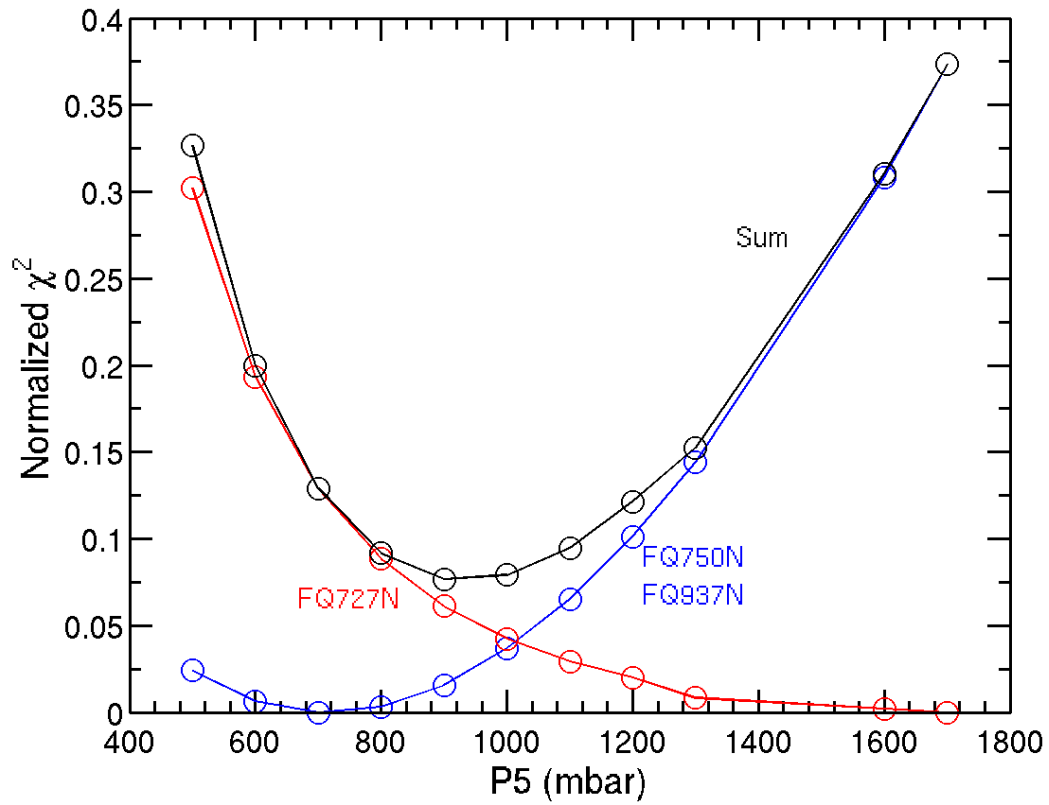

**Supplementary Figure 2.** Sensitivity of the White Spot model to the pressure level of the bottom cloud. The vertical represents the mean square deviation values normalized to the minimum case for the penetrating filters FQ750N and FQ937N (blue circles), the intermediate FQ727N (red circles) and the sum of all of them. While penetrating filters support a cloud located higher in the troposphere, it would become too bright in FQ727N. A compromise solution is found around 1 bar.

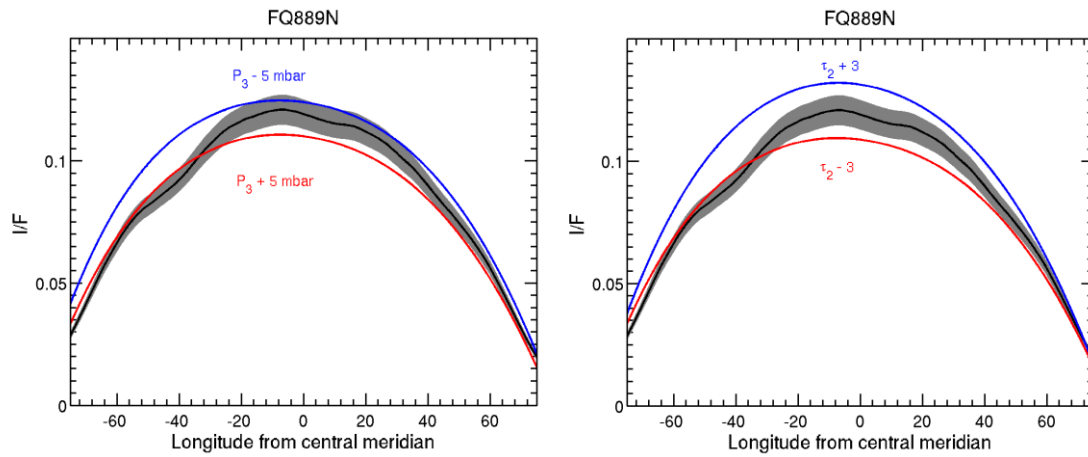

**Supplementary Figure 3.** Sensitivity of the FQ889N observations (solid line) to the pressure top and optical thickness of the tropospheric haze around the optimum values. Gray area define the calibration uncertainty as described in the text. The fluctuations of the observations around the mean values roughly correspond to changes in the atmospheric parameters shown in this figure.

**Supplementary Table 1: Ground-based images, contributors and telescopes**

| <b>Observer</b>      | <b>Location</b> | <b>Telescope diameter</b> | <b>Number of Images</b> |
|----------------------|-----------------|---------------------------|-------------------------|
| T. Barry*            | Australia       | 40.6 cm                   | 17                      |
| T. Olivetti*         | Thailand        | 41 cm                     | 9                       |
| M. Kardasis*         | Greece          | 35.6 cm                   | 5                       |
| A. Germano*          | Brazil          | 28 cm                     | 4                       |
| A. Wesley*           | Australia       | 40.6 cm                   | 4                       |
| P. Miles†            | Australia       | 35.6 cm                   | 3                       |
| M. Delcroix*         | France          | 32 cm                     | 1                       |
| C. Go*               | Phillipines     | 35.6 cm                   | 1                       |
| T. Horiuchi†         | Japan           | 30 cm                     | 1                       |
| P. Maxson†           | USA             | 31.5 cm                   | 1                       |
| <b>UPV/EHU team*</b> |                 |                           |                         |
| A. Sánchez-Lavega    | Spain           | 28 cm (1)                 | 5                       |
| Planetcam            | Spain           | 2.2 m (2)                 | 5                       |

**\*IOPW/PVOL database:**

<http://www.pvol.ehu.es/pvol/>

**†ALPO Japan:**

<http://alpo-j.asahikawa-med.ac.jp/Latest/Saturn.htm>

(1) Aula EspaZio Gela Observatory [29]

(2) Calar Alto Observatory (Centro Astronómico Hispano Alemán), [30]

**Supplementary Table 2: HST list of images**

| <b>Image</b>              | <b>Time (UT)</b> | <b>Filter</b> | <b>Exposure (s)</b> |
|---------------------------|------------------|---------------|---------------------|
| <b>Date: 29 June 2015</b> |                  |               |                     |
| ict901kiq_drz.fits        | 22:56:01         | F689M         | 1.70                |
| ict901kjq_drz.fits        | 22:57:32         | F547M         | 1.90                |
| ict901kkq_drz.fits        | 22:58:55         | F410M         | 20.0                |
| ict901klq_drz.fits        | 23:01:32         | FQ727N        | 40.0                |
| ict901kmq_drz.fits        | 23:06:21         | FQ750N        | 20.0                |
| ict901knq_drz.fits        | 23:10:58         | FQ889N        | 55.0                |
| ict901kpq_drz.fits        | 23:19:56         | FQ889N        | 55.0                |
| ict901kqq_drz.fits        | 23:25:00         | FQ937N        | 45.0                |
| ict901krq_drz.fits        | 23:30:18         | F502N         | 23.0                |
| ict901ksq_drz.fits        | 23:32:35         | F225W         | 55.0                |
| ict901kuq_drz.fits        | 23:37:27         | F225W         | 55.0                |
| ict901kvq_drz.fits        | 23:40:19         | F336W         | 30.0                |
| ict901kwq_drz.fits        | 23:42:03         | F689M         | 1.70                |
| <b>Date: 30 June 2015</b> |                  |               |                     |
| ict902u8q_drz.fits        | 19:36:41         | F410M         | 20.0                |
| ict902u9q_drz.fits        | 19:39:18         | FQ727N        | 40.0                |
| ict902uaq_drz.fits        | 19:44:07         | FQ750N        | 20.0                |
| ict902ubq_drz.fits        | 19:48:44         | FQ889N        | 55.0                |
| ict902ucq_drz.fits        | 19:53:13         | FQ889N        | 55.0                |
| ict902udq_drz.fits        | 19:57:42         | FQ889N        | 55.0                |
| ict902ueq_drz.fits        | 20:02:46         | FQ937N        | 45.0                |
| ict902ufq_drz.fits        | 20:08:00         | F689M         | 1.70                |
| ict902ugq_drz.fits        | 20:09:29         | F502N         | 23.0                |

|                          |          |        |      |
|--------------------------|----------|--------|------|
| ict902uhq_drz.fits       | 20:11:46 | F225W  | 55.0 |
| ict902uiq_drz.fits       | 20:14:12 | F225W  | 55.0 |
| ict902ukq_drz.fits       | 20:19:30 | F336W  | 30.0 |
| ict902ulq_drz.fits       | 20:21:20 | F547M  | 1.90 |
| ict902umq_drz.fits       | 20:22:39 | F689M  | 1.70 |
| <b>Date: 1 July 2015</b> |          |        |      |
| ict903auq_drz.fits       | 17:52:49 | F689M  | 1.70 |
| ict903avq_drz.fits       | 17:54:18 | F502N  | 23.0 |
| ict903awq_drz.fits       | 17:56:35 | F225W  | 55.0 |
| ict903axq_drz.fits       | 17:59:01 | F225W  | 55.0 |
| ict903ayq_drz.fits       | 18:01:27 | F225W  | 55.0 |
| ict903azq_drz.fits       | 18:04:19 | F336W  | 30.0 |
| ict903b0q_drz.fits       | 18:06:03 | F689M  | 1.70 |
| ict903b1q_drz.fits       | 18:08:35 | FQ937N | 45.0 |
| ict903b2q_drz.fits       | 18:13:29 | FQ889N | 55.0 |
| ict903b3q_drz.fits       | 18:17:58 | FQ889N | 55.0 |
| ict903b4q_drz.fits       | 18:22:27 | FQ889N | 55.0 |
| ict903b5q_drz.fits       | 18:27:48 | FQ750N | 20.0 |
| ict903b6q_drz.fits       | 18:32:17 | FQ727N | 40.0 |
| ict903b7q_drz.fits       | 18:37:31 | F547M  | 1.90 |
